# Supplementary material for: Sex Differences in the Prevalence of Head and Neck Cancers: A 10-Year Follow-Up Study of 10 Million Healthy People
Source: MDPI journal article supplement (doi:10.3390/cancers14102521), 2022-05-20
Supplement: s1 [file s1]

**Table S1.** The International Classification of Disease, Tenth Revision, Clinical Modification (ICD-10-CM) codes used to diagnose head-and-neck cancers.

| The head-and-neck cancers | ICD-10 codes                                                                                                                 |
|---------------------------|------------------------------------------------------------------------------------------------------------------------------|
| Laryngeal cancer          | C32.0, C32.1, C32.2, C32.3, C32.9, C32.8                                                                                     |
| Sino-nasal cancer         | C31.0, C31.1, C31.2, C31.3, C31.8, C31.9                                                                                     |
| Hypopharyngeal cancer     | C12, C13.0, C13.1, C13.2, C13.8, C13.9                                                                                       |
| Oropharyngeal cancer      | C01, C02.4, C09.0, C09.1, C09.8, C09.9, C10.0, C10.1, C10.2, C10.3, C10.8, C10.9, C14.0, C14.2, C14.8                        |
| Oral cancer               | C02.0, C02.1, C02.2, C02.3, C02.8, C02.9, C03.0, C03.1, C03.9, C04.9, C05.2, C05.8, C05.9, C06.0, C06.1, C06.2, C06.8, C06.9 |
| Nasopharyngeal cancer     | C11.0, C11.1, C11.2, C11.3, C11.8, C11.9                                                                                     |
| Salivary gland cancer     | C07, C08.0, C08.1, C08.8, C08.9                                                                                              |

**Table S2.** The incidence of head-and-neck cancers in healthy men and women by age during the 10-year follow-up period.

|                          | Age group | Male   |        |        | Female |        |        |
|--------------------------|-----------|--------|--------|--------|--------|--------|--------|
|                          |           | IR     | Lower  | Upper  | IR     | Lower  | Upper  |
| Overall Head Neck Cancer | 20-29     | 0.018  | 0.015  | 0.023  | 0.017  | 0.013  | 0.021  |
|                          | 30-39     | 0.041  | 0.037  | 0.045  | 0.027  | 0.023  | 0.033  |
|                          | 40-49     | 0.115  | 0.109  | 0.121  | 0.046  | 0.042  | 0.05   |
|                          | 50-59     | 0.296  | 0.285  | 0.308  | 0.066  | 0.06   | 0.071  |
|                          | 60-69     | 0.538  | 0.518  | 0.559  | 0.099  | 0.091  | 0.108  |
|                          | 70-       | 0.711  | 0.677  | 0.747  | 0.15   | 0.137  | 0.164  |
| Laryngeal Cancer         | 20-29     | 0.001  | 0.0004 | 0.0024 | 0.0004 | 0.0001 | 0.0017 |
|                          | 30-39     | 0.0038 | 0.0028 | 0.0051 | 0.0005 | 0.0001 | 0.0019 |
|                          | 40-49     | 0.022  | 0.02   | 0.025  | 0.002  | 0.0013 | 0.0031 |
|                          | 50-59     | 0.1    | 0.093  | 0.107  | 0.0043 | 0.0031 | 0.0059 |
|                          | 60-69     | 0.212  | 0.2    | 0.225  | 0.0074 | 0.0054 | 0.01   |
|                          | 70-       | 0.299  | 0.277  | 0.322  | 0.014  | 0.011  | 0.019  |
| Sino-nasal Cancer        | 20-29     | 0.0012 | 0.0005 | 0.0027 | 0.001  | 0.0004 | 0.0025 |
|                          | 30-39     | 0.0034 | 0.0025 | 0.0047 | 0.0012 | 0.0005 | 0.0028 |
|                          | 40-49     | 0.0052 | 0.004  | 0.0067 | 0.0036 | 0.0026 | 0.005  |
|                          | 50-59     | 0.012  | 0.0098 | 0.015  | 0.0055 | 0.0041 | 0.0073 |
|                          | 60-69     | 0.021  | 0.017  | 0.025  | 0.0077 | 0.0057 | 0.01   |
|                          | 70-       | 0.027  | 0.021  | 0.034  | 0.013  | 0.0094 | 0.017  |
| Hypopharyngeal Cancer    | 20-29     | 0.0002 | 0      | 0.0014 | 0.0002 | 0      | 0.0015 |
|                          | 30-39     | 0.0007 | 0.0004 | 0.0014 | 0.0009 | 0.0004 | 0.0025 |
|                          | 40-49     | 0.0055 | 0.0043 | 0.0071 | 0.0008 | 0.0004 | 0.0016 |
|                          | 50-59     | 0.026  | 0.023  | 0.03   | 0.0019 | 0.0011 | 0.003  |
|                          | 60-69     | 0.071  | 0.064  | 0.079  | 0.0029 | 0.0018 | 0.0047 |
|                          | 70-       | 0.105  | 0.092  | 0.119  | 0.0048 | 0.0029 | 0.008  |
| Oropharyngeal Cancer     | 20-29     | 0.002  | 0.0011 | 0.0038 | 0.001  | 0.0004 | 0.0025 |
|                          | 30-39     | 0.007  | 0.0056 | 0.0087 | 0.0024 | 0.0013 | 0.0044 |
|                          | 40-49     | 0.026  | 0.023  | 0.029  | 0.0051 | 0.0039 | 0.0067 |
|                          | 50-59     | 0.061  | 0.056  | 0.066  | 0.0099 | 0.008  | 0.012  |
|                          | 60-69     | 0.085  | 0.078  | 0.094  | 0.012  | 0.0098 | 0.016  |
|                          | 70-       | 0.109  | 0.096  | 0.123  | 0.016  | 0.012  | 0.021  |
| Oral Cancer              | 20-29     | 0.0049 | 0.0033 | 0.0072 | 0.0056 | 0.0039 | 0.0082 |
|                          | 30-39     | 0.011  | 0.0089 | 0.013  | 0.011  | 0.0086 | 0.015  |
|                          | 40-49     | 0.024  | 0.021  | 0.027  | 0.014  | 0.012  | 0.017  |
|                          | 50-59     | 0.049  | 0.044  | 0.054  | 0.02   | 0.018  | 0.024  |
|                          | 60-69     | 0.078  | 0.071  | 0.086  | 0.037  | 0.032  | 0.043  |
|                          | 70-       | 0.104  | 0.091  | 0.118  | 0.064  | 0.056  | 0.074  |
| Nasopharyngeal Cancer    | 20-29     | 0.004  | 0.0026 | 0.0063 | 0.0021 | 0.0011 | 0.0039 |
|                          | 30-39     | 0.0084 | 0.0069 | 0.01   | 0.0038 | 0.0023 | 0.0062 |
|                          | 40-49     | 0.022  | 0.019  | 0.024  | 0.0066 | 0.0052 | 0.0084 |
|                          | 50-59     | 0.028  | 0.025  | 0.032  | 0.0076 | 0.0059 | 0.0096 |
|                          | 60-69     | 0.036  | 0.031  | 0.042  | 0.011  | 0.0089 | 0.015  |

|                       |       |        |        |        |        |        |       |
|-----------------------|-------|--------|--------|--------|--------|--------|-------|
|                       | 70-   | 0.034  | 0.027  | 0.043  | 0.012  | 0.0089 | 0.017 |
| Salivary gland Cancer | 20-29 | 0.0051 | 0.0034 | 0.0075 | 0.0063 | 0.0044 | 0.009 |
|                       | 30-39 | 0.0071 | 0.0057 | 0.0089 | 0.0073 | 0.0052 | 0.01  |
|                       | 40-49 | 0.012  | 0.01   | 0.015  | 0.014  | 0.012  | 0.016 |
|                       | 50-59 | 0.023  | 0.02   | 0.027  | 0.017  | 0.014  | 0.02  |
|                       | 60-69 | 0.039  | 0.034  | 0.045  | 0.022  | 0.018  | 0.026 |
|                       | 70-   | 0.045  | 0.037  | 0.055  | 0.026  | 0.021  | 0.033 |
